# Supplementary material for: Immunomodulation with eicosapentaenoic acid supports the treatment of autoimmune small-vessel vasculitis
Source: PubMed Central journal article supplement — Sci Rep. 2014 Sep 18;4:6406. doi: 10.1038/srep06406 (PMC4166948; doi:10.1038/srep06406), 2014-09-18
Supplement: srep06406-s1.pdf [file srep06406-s1.pdf]

## **Immunomodulation with eicosapentaenoic acid supports the treatment of autoimmune small-vessel vasculitis**

Junichi Hirahashi<sup>1, 10\*</sup>, Kimito Kawahata<sup>2</sup>, Makoto Arita<sup>3</sup>, Ryo Iwamoto<sup>3</sup>, Keiichi Hishikawa<sup>4</sup>, Mie Honda<sup>3</sup>, Yoshifumi Hamasaki<sup>1</sup>, Mototsugu Tanaka<sup>1</sup>, Koshu Okubo<sup>1</sup>, Miho Kurosawa<sup>1</sup>, Osamu Takase<sup>4</sup>, Masanori Nakakuki<sup>5</sup>, Kan Saiga<sup>6</sup>, Kazuo Suzuki<sup>7</sup>, Shoji Kawachi<sup>8</sup>, Akihiro Tojo<sup>1</sup>, George Seki<sup>1</sup>, Takeshi Marumo<sup>9</sup>, Matsuhiko Hayashi<sup>10</sup>, Toshiro Fujita<sup>1,9</sup>

1. Department of Nephrology and Endocrinology, Graduate School of Medicine, The University of Tokyo
2. Department of Allergy and Rheumatology, Graduate School of Medicine, The University of Tokyo
3. Department of Health Chemistry, Graduate School of Pharmaceutical Sciences, The University of Tokyo
4. Department of Advanced Nephrology and Regenerative Medicine, Graduate School of Medicine, The University of Tokyo
5. Development Research, Pharmaceutical Research Center, Mochida Pharmaceutical Co., Ltd.
6. Pharmaceutical Research Laboratories, Nippon Kayaku Co. Ltd.
7. Inflammation Program, Chiba University Graduate School of Medicine
8. Division of Anesthesia, Surgical Operation Department, National Center for Global Health and Medicine
9. Clinical Epigenetics, Research Center for Advanced Science and Technology, The University of Tokyo
10. Apheresis and Dialysis Center, School of Medicine, Keio University

**A running title: EPA for the treatment of ANCA Vasculitis**

**\*Corresponding author: Junichi Hirahashi, MD, PhD**

Apheresis and Dialysis Center, School of Medicine, Keio University, Shinjuku-ku, Tokyo 160-8582, Japan

Tel: +81-3-3353-1211

Fax: +81-3-5800-9738

E-mail: [jhirahashi24@gmail.com](mailto:jhirahashi24@gmail.com)

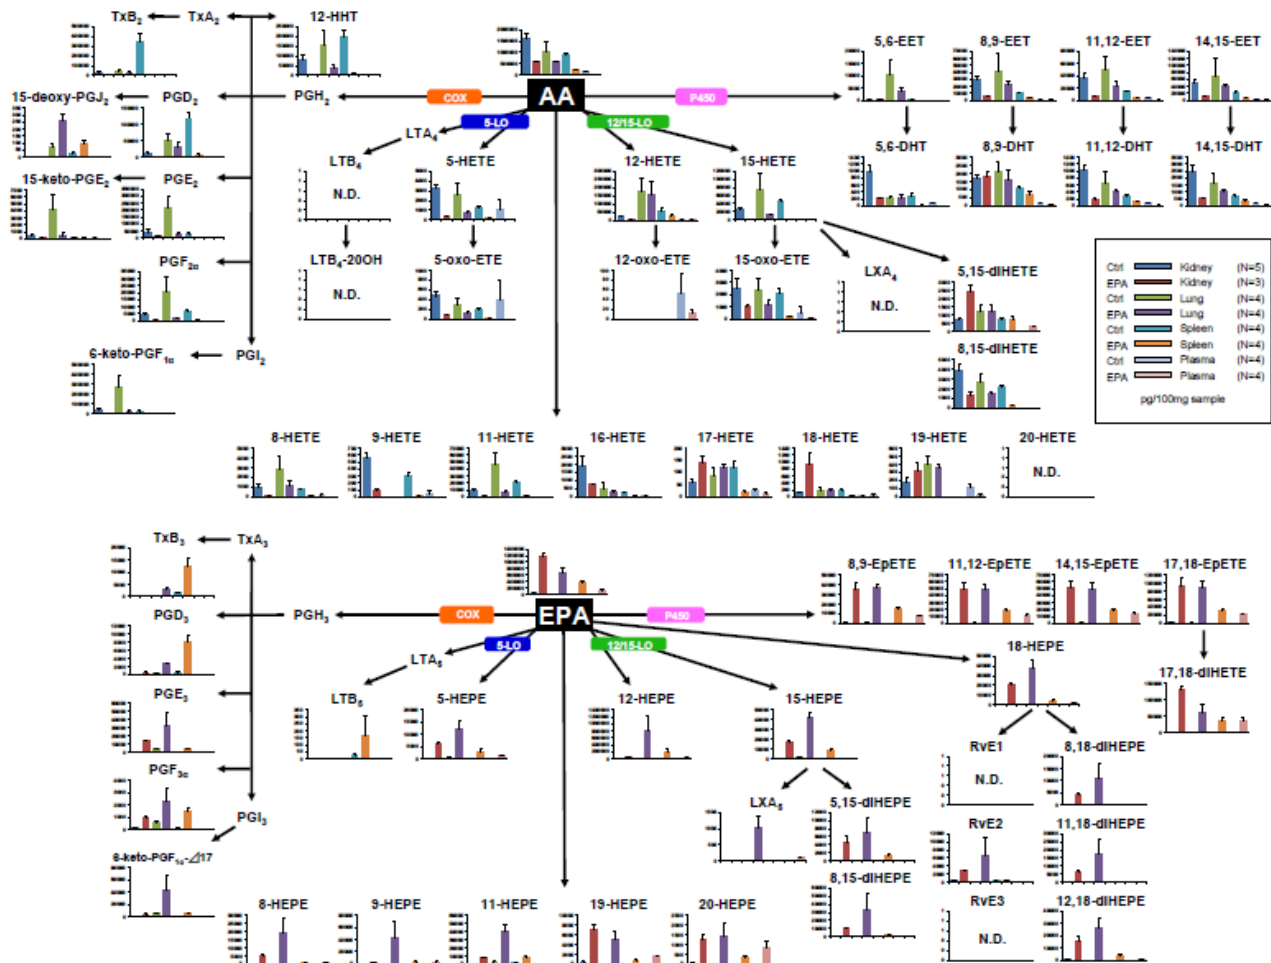

**Supplementary Figure S1.**

AA and EPA-derived lipid mediator lipidomics in the kidney, lung, spleen, and plasma of 12 weeks old SCG/Kj mice fed control or 5% EPA-supplemented diet.

**A**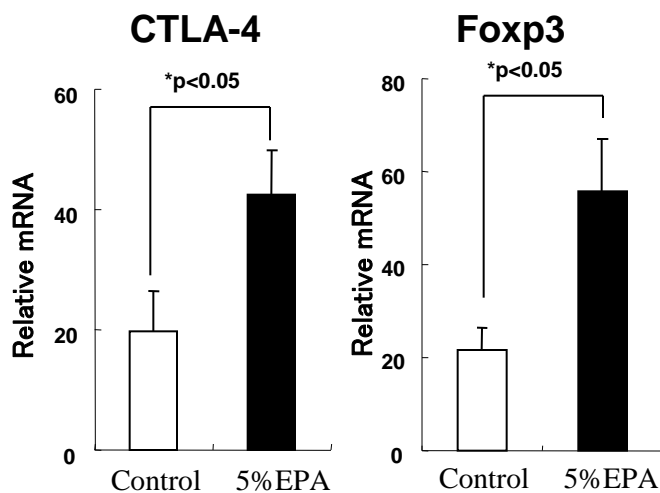**B**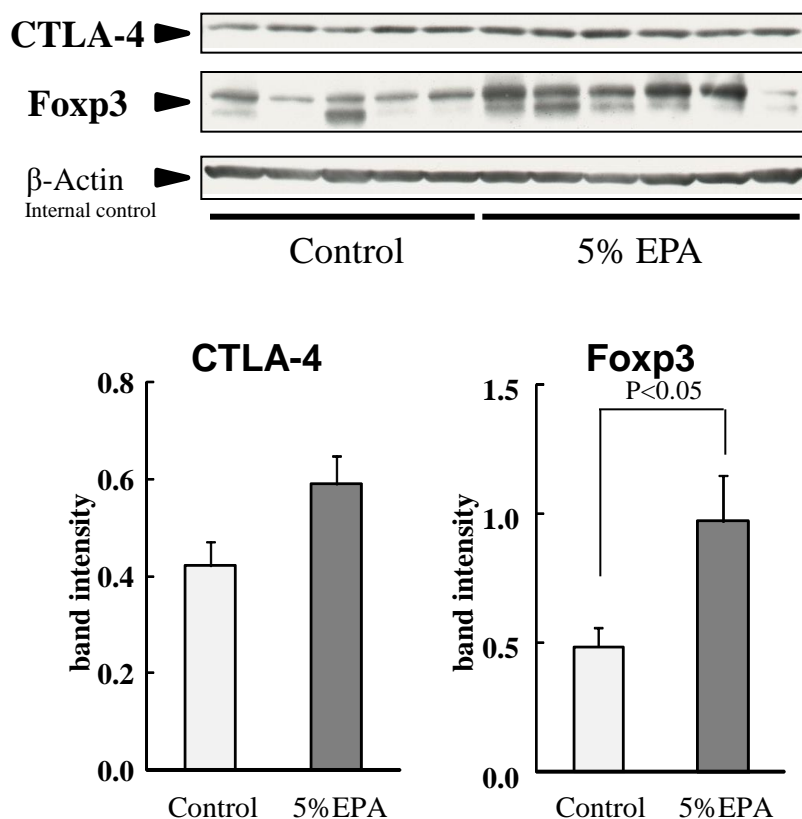

**Supplementary Figure S2A.** Real-time PCR for detection of mRNA expressions of CTLA-4 and Foxp3 in the kidneys from 12-week old SCG/Kj mice, as markers of Tregs.

**Supplementary Figure S2B.** Western blot analysis for detection of protein expressions of CTLA-4, Foxp3, and  $\beta$ -actin as an internal control in the kidneys from 12-week old SCG/Kj mice. The intensity of the CTLA-4 and Foxp3 bands was quantified with image analysis software. Data represent mean  $\pm$  SEM.  $*P < 0.05$  compared with control.
